# Supplementary material for: COVID-19 Vaccine Intention among Rural Residents in Mexico: Validation of a Questionnaire
Source: MDPI journal article supplement (doi:10.3390/vaccines9090952), 2021-08-26
Supplement: s1 [file s1]

## S1: Cuestionario final en español (Final questionnaire in Spanish)

### Sección 3: Percepción positiva de la vacunación en general

|      |                                                                                                   | Muy en desacuerdo | En desacuerdo | Ni de acuerdo ni en desacuerdo | De acuerdo | Muy de acuerdo |
|------|---------------------------------------------------------------------------------------------------|-------------------|---------------|--------------------------------|------------|----------------|
| 18.  | Las vacunas son seguras.                                                                          | 1                 | 2             | 3                              | 4          | 5              |
| 19.  | Confío en el consejo del personal médico y de enfermería cuando me dicen que tengo que vacunarme. | 1                 | 2             | 3                              | 4          | 5              |
| 20.* | Las vacunas no funcionan.                                                                         | 1                 | 2             | 3                              | 4          | 5              |
| 21.* | Las vacunas contienen ingredientes dañinos para la salud.                                         | 1                 | 2             | 3                              | 4          | 5              |
| 22.* | Las vacunas causan efectos negativos a la salud a largo plazo.                                    | 1                 | 2             | 3                              | 4          | 5              |

### Sección 4: Percepción positiva de la vacuna contra COVID-19

|     |                                                                                                           | Muy en desacuerdo | En desacuerdo | Ni de acuerdo ni en desacuerdo | De acuerdo | Muy de acuerdo |
|-----|-----------------------------------------------------------------------------------------------------------|-------------------|---------------|--------------------------------|------------|----------------|
| 23. | Si me aplico la vacuna contra el COVID-19, el riesgo de contagiarme por COVID-19 va a bajar.              | 1                 | 2             | 3                              | 4          | 5              |
| 25. | Aplicarme la vacuna contra el COVID-19 es una forma de proteger a la gente que me rodea del COVID-19.     | 1                 | 2             | 3                              | 4          | 5              |
| 27. | Vacunarnos todos en contra del COVID-19 es necesario para terminar con la pandemia de COVID-19 en México. | 1                 | 2             | 3                              | 4          | 5              |
| 28. | En cuanto tenga la oportunidad, me vacunaré contra el COVID-19.                                           | 1                 | 2             | 3                              | 4          | 5              |

### Sección 5: Percepción negativa de la vacuna contra COVID-19

|     |                                                                                                                    | Muy en desacuerdo | En desacuerdo | Ni de acuerdo ni en desacuerdo | De acuerdo | Muy de acuerdo |
|-----|--------------------------------------------------------------------------------------------------------------------|-------------------|---------------|--------------------------------|------------|----------------|
| 29. | No me vacunaré contra el COVID-19 porque muy probablemente tendré una reacción alérgica o efecto secundario grave. | 1                 | 2             | 3                              | 4          | 5              |
| 30. | No me vacunaré contra el COVID-19 porque los efectos secundarios no me dejarán ir a trabajar.                      | 1                 | 2             | 3                              | 4          | 5              |
| 32. | No me vacunaré contra el COVID-19 porque la vacuna no es segura.                                                   | 1                 | 2             | 3                              | 4          | 5              |
| 33. | No me vacunaré contra el COVID-19 porque creo que la vacuna no sirve.                                              | 1                 | 2             | 3                              | 4          | 5              |
| 34. | No me vacunaré contra el COVID-19 porque no cuento con información suficiente respecto a la vacuna.                | 1                 | 2             | 3                              | 4          | 5              |
| 35. | Creo que no me voy a contagiar por COVID-19, por lo que no necesito aplicarme la vacuna.                           | 1                 | 2             | 3                              | 4          | 5              |

### Sección 6: Creencias personales como barrera de salud

|     |                                                                    | Muy en desacuerdo | En desacuerdo | Ni de acuerdo ni en desacuerdo | De acuerdo | Muy de acuerdo |
|-----|--------------------------------------------------------------------|-------------------|---------------|--------------------------------|------------|----------------|
| 37. | Rezar me ha funcionado para prevenir que me contagie por COVID-19. | 1                 | 2             | 3                              | 4          | 5              |
| 38. | Si Dios quiere, me mantendré sano.                                 | 1                 | 2             | 3                              | 4          | 5              |
| 39. | Si me enfermo, es por la voluntad de Dios.                         | 1                 | 2             | 3                              | 4          | 5              |
| 40. | De algo me tengo que morir.                                        | 1                 | 2             | 3                              | 4          | 5              |
| 41. | Me voy a enfermar sin importar lo que haga.                        | 1                 | 2             | 3                              | 4          | 5              |

\* Estos ítems deben ser codificados de manera inversa en la base de datos, ya que tienen una dirección opuesta al sentido del resto de ítems de la sección.  
 (\* These items have to be coded in the opposite direction as they are answered, so that they keep the same sense among the other of items in the section.)

## S2: English translation of the final questionnaire

### Section 3: Positive perception of vaccination

|      |                                                                                                    | Strongly disagree | Disagree | Neither agree, nor disagree | Agree | Strongly agree |
|------|----------------------------------------------------------------------------------------------------|-------------------|----------|-----------------------------|-------|----------------|
| 18.  | Vaccines are safe.                                                                                 | 1                 | 2        | 3                           | 4     | 5              |
| 19.  | I trust in the advice of the medical and nursing staff when they tell me I need to get vaccinated. | 1                 | 2        | 3                           | 4     | 5              |
| 20.* | Vaccines do not work.                                                                              | 1                 | 2        | 3                           | 4     | 5              |
| 21.* | Vaccines contain ingredients that are harmful to health.                                           | 1                 | 2        | 3                           | 4     | 5              |
| 22.* | Vaccines cause long-term negative health effects.                                                  | 1                 | 2        | 3                           | 4     | 5              |

### Section 4: Positive perception of the COVID-19 vaccine

|     |                                                                                          | Strongly disagree | Disagree | Neither agree, nor disagree | Agree | Strongly agree |
|-----|------------------------------------------------------------------------------------------|-------------------|----------|-----------------------------|-------|----------------|
| 23. | If I get vaccinated against COVID-19, my risk of getting COVID-19 will decrease.         | 1                 | 2        | 3                           | 4     | 5              |
| 25. | Getting the COVID-19 vaccine is one way to protect the people around me from COVID-19.   | 1                 | 2        | 3                           | 4     | 5              |
| 27. | Vaccinating us all against COVID-19 is necessary to end the COVID-19 pandemic in Mexico. | 1                 | 2        | 3                           | 4     | 5              |
| 28. | As soon as I have the opportunity, I will get vaccinated against COVID-19.               | 1                 | 2        | 3                           | 4     | 5              |

### Section 5: Negative perception of the COVID-19 vaccine

|     |                                                                                                                         | Strongly disagree | Disagree | Neither agree, nor disagree | Agree | Strongly agree |
|-----|-------------------------------------------------------------------------------------------------------------------------|-------------------|----------|-----------------------------|-------|----------------|
| 29. | I will not get vaccinated against COVID-19 because I will most likely have an allergic reaction or serious side effect. | 1                 | 2        | 3                           | 4     | 5              |
| 30. | I will not get vaccinated against COVID-19 because the side effects will prevent me to go to work.                      | 1                 | 2        | 3                           | 4     | 5              |
| 32. | I will not get vaccinated against COVID-19 because the vaccine is not safe.                                             | 1                 | 2        | 3                           | 4     | 5              |
| 33. | I will not get vaccinated against COVID-19 because I think the vaccine is useless.                                      | 1                 | 2        | 3                           | 4     | 5              |
| 34. | I will not get vaccinated against COVID-19 because I do not have enough information regarding the vaccine.              | 1                 | 2        | 3                           | 4     | 5              |
| 35. | I do not think I am going to get COVID-19, so I do not need to get vaccinated.                                          | 1                 | 2        | 3                           | 4     | 5              |

### Sección 6: Personal beliefs as a health barrier

|     |                                                                | Strongly disagree | Disagree | Neither agree, nor disagree | Agree | Strongly agree |
|-----|----------------------------------------------------------------|-------------------|----------|-----------------------------|-------|----------------|
| 37. | Praying has helped me to prevent myself from getting COVID-19. | 1                 | 2        | 3                           | 4     | 5              |
| 38. | If it is God's will, I will stay healthy.                      | 1                 | 2        | 3                           | 4     | 5              |
| 39. | If I get sick, it is by the will of God.                       | 1                 | 2        | 3                           | 4     | 5              |
| 40. | I will die of something. <sup>1</sup>                          | 1                 | 2        | 3                           | 4     | 5              |
| 41. | I'm going to get sick no matter what I do.                     | 1                 | 2        | 3                           | 4     | 5              |

\* These items have to be coded in the opposite direction as they are answered, so that they keep the same sense among the other of items in the section.)

<sup>1</sup> This item refers to the cultural belief in Mexico, that it is not worth to adopt healthy attitudes or preventive measures towards diseases, since we will all die eventually of a disease. This is the literal English translation from the Spanish, since there is no similar saying in the English language and is probably not applicable for English-speaking participants.
